# Supplementary material for: Structure and Polymorphism of the Major Histocompatibility Complex Class II Region in the Japanese Crested Ibis, Nipponia nippon
Source: PLoS One. 2014 Sep 23;9(9):e108506. doi: 10.1371/journal.pone.0108506 (PMC4172706; doi:10.1371/journal.pone.0108506)
Supplement: Figure S2 — Partial sequence of collagen-type XI α-2-like gene in the Nipponia nippon MHC class II region. B, P, Sc, and X represent restriction sites used for subcloning of BamHI, PstI, SacI, and XhoI, respectively. Solid bars and arrows below the map indicate the location of isolated lambda phage clone and sequenced regions, respectively. Gap regions are shown as “N.” A BLAST search against the human genome + transcripts database revealed that this partial sequence was homologous to collagen-type XI α-2 transcript. (PDF) [file pone.0108506.s002.pdf]

GCAAGCAAAACCCCTCTCTAGTTATCATCCATTCAATTTGTCAAATTTGGTGTGTGAGTGGTTTCATCTGGTATTGAAAGCATACTTAGGGAGGTTCAACCTCTGCCACGTTTCATTAATAAATTGCTCCCTCTAGAAAAA  
 GAATAACCGTTGGATTTTGACAGGCCCGGGCGTGAAGAGCCCCAAGTAAGTTTTGAGCAGCGTTAAAGGGGGGACTGTGATCTCCCCCTCCCCACACCCCTCTCCTGGGGGGTGGGGGGGCTCCCTGGGGGGTGGGGGGG  
 CCGATGGACCATCCATCACCCCCCTCACCTCTCCCGCAGGGTCCCAGGGGTACGCGGGGACCACGAGGAGCCACCGGCAAGTCAGGGGCAAGAGTCAGTCTTTGGGGGGGGGGGGGCGGGCTCACCTTGGCCCTTGTG  
 CGTGACAAATCGCACACGCGCGTGACAGCTCTGGCACCAGCTGCGCGGAGCTGGGCACCCGCTGGGCACCCGCAAACTTCTCGCTCCCTCAGGGCAGCTCTGGCAGCGATGGCCCCACGGCCCCCAGGTGAACGGG  
 TAAGTGGGCGTCCAGCCTGGATTTAGAGGGGGGGTGGGGTCCAGCTTGACAGGACCCCTGGTGCCATCCCCACCAGCCACCACCGCACTGTGCCAAGCTCTGGGACCCCCCCCAGTGC CGCCATCACCCAGACC  
 CCCAGCTCCCTCCGCGCGGCGCACGAGCTCCGTCTCCCTCGCGCGGGGTGGGGGGGGGTGGTGATGCTGTGCTAACGAGCTCNNNNNNNNNNNNNNNNNNNNNNNNNNNNNNNNNNNNNNNNNNNNNNNNNNNNNNN  
 NNNNNNNNNNNNNNNNNNNNNNNNNNNNNNNNNNNNNNNNNNNNNNNNNNNNNNNNNNNNNNNNNNNNNNNNNNNNNNNNNNNNNNNNNNNNNNNNNNNNNNNNNNNNNNNNNNNNNNNNNNNNNNNNNNNNNNNNNNNNN  
 CGACCAGGACCACAGGGACCACCGGGCCCTGCCGAGAGAAAGGAGTTCCCGTGAGTGCTCAGGGACATCCCCCTCGCATCCCGCAGGGAAAGCGGCGGGTCCAGGAGGGGTGCAAGGGGGTGGGTGCTTGCACCCCTCAC  
 CCCCCCTTTTACATCCCTCTAGGGTGAGAAGGGCCCCATGGGTCCCGCTGGCGGGATGGCGTTACAGGTCTGTGGGTTTACCTGGCCAGCGGCCCCCGGCGGCCCCGGGAGGACGGTGACAAGGTGAGGTCC  
 TACCCTGCCCGGTGTACCGTGCGCCCCGATGCACTGGGGTGAACACCTTCTTCTCCCTCCAGGGTGAGGTGGGCGAGCCGGGACAGAAAGGCAACAAGGGCGAGCACGTGAGTGTGATGGGTGTCCCT  
 CCTCCCCATACCTTGTCCCTGCTGTCCCAGGGGCTGTCCCAGCCTCACTGACCCCTTCCCTCCCTCACAGGTCTCTGGTCCCTTGGGCCATCGGGTCAGTCGGGACGCCGGAGCCGCTGTGAGTATCCAGAG  
 GCAGGGCAACGTACGGTCTGTGGCGCGATGTGGACGGAAGGCTCCTGTGCCACACCTGCGGCCACACGCAGTAGGGGACGGTCTCAGCTAGGAGACGTCCCTGTCTCNNNNNNNNNNNNNNNNNNNNNNNNNNNNNNNNNNNNNNN  
 NNNNNNNNNNNNNNNNNNNNNNNNNNNNNNNNNNNNNNNNNNNNNNNNNNNNNNNNNNNNNNNNNNNNNNNNNNNNNNNNNNNNNNNNNNNNNNNNNNNNNNNNNNNNNNNNNNNNNNNNNNNNNNNNNNNNNNNNNNNNN  
 CTCTGTGAGAAGGTACGTCCCGGACATCGGGTTCGCTCCCGGGAGCCGCCCTAGCGGGTGCAGAGGTGGGTGAGGCCGTGGGGCCGTAGTGGTCTATGGGACAAGGAACCAATCCGGAGGGCTTGGTCCAGAG  
 CGGGGACAAGGTGGCACGGTGCAGGGAGGGTTTGACACCTCTCTGTTCCCGTTTTCAGGGGGACCCCGGTGAATCGGGAGCCCCGGGAATCCAAGGGGAGCCAGGAGTCAAGGTGAGTGTGAGCAGGGACACCCCGCTTCTG  
 TCCCCGTCCCTGGCTGGCCCTGCGGCTGCTGACCCCATCTTGACCCGAGGGGCCACGAGGAGAGCGAGGGGAGAAGGGAGAAGCCGGAGCTGCGGCTGCTGCTGGGCCACCTGGAGGGAAAGGGCCCCCGGCGACGAC  
 GGGCCAAAGGGCAACCCCGTGAGTGCCGTGTCCCACCCAGGATGACGGGGACACGGGGAGGGAGCAGGAGGGGTTGCTCCGGGAAGCGTTGGGACCCCTTGAGGGGAGGTCCAGGGTCCCTCAGGCTAGCAGCTCGC  
 TCTGTTTCAGGGTCCCGTTGGCTTCCAGGCGATCCCGGACCCCAAGGTGAAATGGGTCCCAGGGTGAGTGTGCGCATCCCACCCCTCTGGGCTTCTACTGGAGGGGGCTTCCCTGGGAATGGCGTTGGGATTTGGGGGTGT  
 GTGCGGGACCTTGTGCTGACTCCAGTTTTCCTTCCCGACAGGGCCAGGATGGCGCAAGGGCGAGCGTGGGAGGACCGCGAGCCCGGGGAGCCGGTGAGTGCCCCGTTCCGGCACGTCCCCCCTCACCATCGCTCTGG  
 GCAGGGGTGCTCGACCAGATCCCCCTGCGAGGTTTGGGACTGGATTAACCTCACTGCTTCAGGAATGTAGGGAGTGGGAGCGCAGCCTGTCCCCCTTCCGCGGCCATTGGATCTGGTCCCCCTGGTCTGGATCCNN  
 NNNNNNNNNNNNNNNNNNNNNNNNNNNNNNNNNNNNNNNNNNNNNNNNNNNNNNNNNNNNNNNNNNNNNNNNNNNNNNNNNNNNNNNNNNNNNNNNNNNNNNNNNNNNNNNNNNNNNNNNNNNNNNNNNNNNNNNNNNNNN  
 CTACTGGACCATCGGCCCGCGGGCCCCCGGACTTCCCGTAGTGCTCCCGTGTGCTATCGGGTCCCTCCCTCTCCTCGCCCCGCTGCTCGCTCCCCCTCTCTCCTCTTGTGCTCTGGGTCCCAGTTTCCCTCCCTG  
 CGTTTGGGGGGGCGGGGGGCTGCTGTCTCCCAACCCACTTTGCCAGCCCCAGTCGCTGACAGACCTGGTTTTGCTTTGACAGGGCCAGCTGGTCCCAAAGGTGCCAAGGGAGCCATGGTAAGCGCCGAGCGGTGCCCC  
 ACCTTGCCACCACCTTCAGTCCTGCCAAGGCTGACCTCTGTAGTGTCTCTTCTCTAGGGTCAAGCAGGACCCAAAGGTGAACGTGGACCCCAAGGACCCCTGGACACCCCGTGAGTGGCTCAAGCGTTTGGCACCAGG  
 GAAGGAATGACACCGGGGTGGGGGATGTAGGAACAGCTCCTCGGTAGGTAAATGACACCCAGGAATGGACGTGGAGGATGTCTTCTATCTCAAAGCCTGAGCAGCGGGTGTTTGGGGCCCTGGGGAGTGGGGGCTTGG  
 CAGCCCCCATGCTCGGGTGTGACAGTGGTGTGCTGCCACAGGGTCCCTCGGGAGGTGATCCAGCCCTGCCAATCCAGCTGCCAAGAAGAGCAAGCGCTCATTGACGCCAGCANNNNNNNNNNNNNNNNNNNNNNNNNNNNNNN  
 NNNNNNNNNNNNNNNNNNNNNNNNNNNNNNNNNNNNNNNNNNNNNNNNNNNNNNNNNNNNNNNNNNNNNNNNNNNNNNNNNNNNNNNNNNNNNNNNNNNNNNNNNNNNNNNNNNNNNNNNNNNNNNNNNNNNNNNNNNNNN  
 TGGACTTCGGCGAGCCCGCCAGAGGTTTGGGTTGAGGTTGGGCCAGTCTGTTTCTCGGCTAGGACCAAACCGTCACCTCCTTGCACACCTGGCTCCAGTGGGGCAAACTTGCCTCTCGCATCCCCCACTGCC  
 TCCGAGCGGCGAAGCAGCAAGACCCGCTCCCCCTCGCATCAGTCACCCACCCGCTGGTGCGAGGAGCTGCGGTGCCAGCCCTGCCACACGCACCGAGACCGACGCGCGCGCTGCCGCCCCACGCGGGGCCAGGGTCT  
 GGAGAGATGCCAAAGAGACTTTAACGCTTAGAATAAATCTATATTTTAAATATGTAGAGAGGCAGAGAGGAAAAATTTTAAACGGATCCCCCCTCGGGAGCTATGGCTGGGAGAGGGGGGCCACACTACCACCGGTCTGG  
 TGGCCAGCCTGGCTGTGGTACCGGTTTGCCTTGTCTCCCTGCACAGGCGAGAGGACAAGGTGAGTCCCACCGGTCTGGAGTCGGTGCCGCGGTGGCAGCGCACACCCCGGGCAGCTCCCCTTGAACCATGGGCACAG  
 TGACATGTCCAGTCCCCTCCCGGTGTGACAGTCAGACCTCACCCCTCCTCTGCGCTTTGACCCCGGGCATGGGATCC
