# Supplementary material for: Structure and Polymorphism of the Major Histocompatibility Complex Class II Region in the Japanese Crested Ibis, Nipponia nippon
Source: PubMed Central journal article supplement (PMC4172706; doi:10.1371/journal.pone.0108506), 2014-09-23

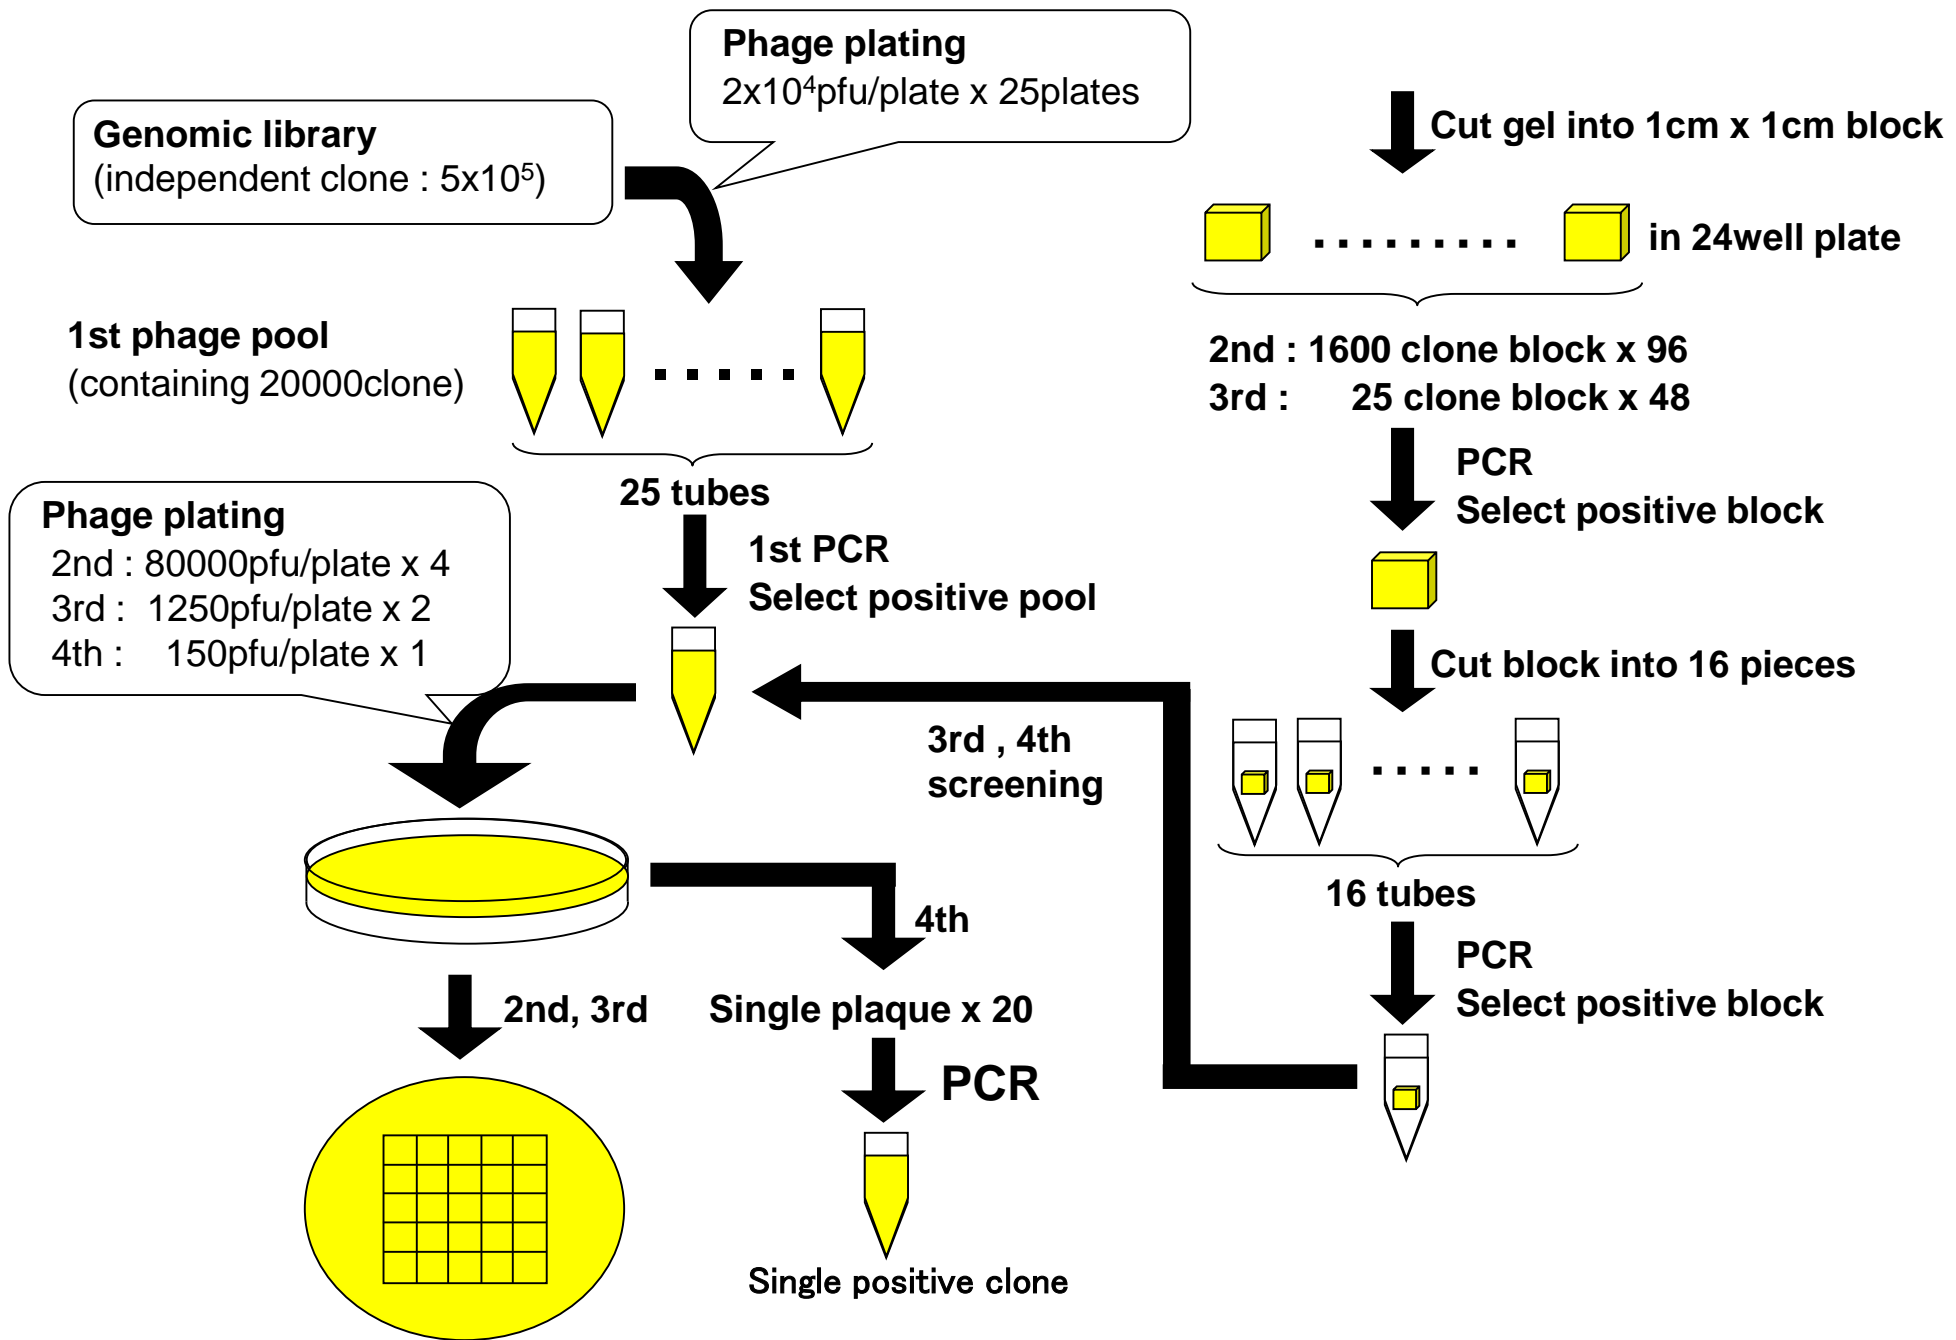

Supplement: pone.0108506.s001.pdf [file pone.0108506.s001.pdf]
